# Supplementary material for: Analysis of the impact of adherence to guidelines and expert advice in patients with myelodysplastic syndromes
Source: PubMed Central journal article supplement (PMC7817552; doi:10.1007/s00277-020-04325-7), 2020-11-07
Supplement: 277_2020_4325_MOESM1_ESM.pdf [file 277_2020_4325_MOESM1_ESM.pdf]

**Table 1.** Baseline characteristics. Summary of baseline characteristics in the retrospective cohort 1 and the prospective cohort 2

|                                      | <b>Retrospective Cohort 1</b> | <b>Prospective Cohort 2</b> | <b>p-value</b> |
|--------------------------------------|-------------------------------|-----------------------------|----------------|
| <b>median age at first diagnosis</b> | n = 1658<br>67 (18-99)        | n = 381<br>64 (23-88)       | 0.015          |
| <b>gender</b>                        | n / %                         | n / %                       |                |
| male                                 | 1015 / 61.2                   | 233 / 61.2                  | 1.000          |
| female                               | 642 / 38.7                    | 148 / 38.8                  |                |
| <b>WHO 2016 subtype</b>              | n = 1653                      | n = 381                     |                |
| MDS SLD                              | 93 / 5.6                      | 9 / 2.4                     | 0.306          |
| MDS RS SLD                           | 67 / 4.0                      | 15 / 3.9                    |                |
| MDS MLD                              | 457 / 27.6                    | 105 / 27.6                  |                |
| MDS RS MLD                           | 110 / 6.6                     | 31 / 8.1                    |                |
| MDS EB 1                             | 203 / 12.2                    | 40 / 10.5                   |                |
| MDS EB 2                             | 254 / 15.3                    | 53 / 13.9                   |                |
| MDS del(5q)                          | 100 / 6.0                     | 17 / 4.5                    |                |
| CMML                                 | 164 / 9.9                     | 43 / 11.3                   |                |
| sAML                                 | 149 / 9.0                     | 16 / 4.2                    |                |
| MDS U                                | 18 / 1.1                      | 27 / 7.1                    |                |
| RARS-T                               | 11 / 0.7                      | 6 / 1.6                     |                |
| MDS-NOS                              | 0 / 0                         | 19 / 4.9                    |                |
| <b>IPSS risk group</b>               | n = 1658                      | n = 218                     |                |
| low risk                             | 395 / 23.8                    | 121 / 35.9                  | 0.001          |
| intermediate risk I                  | 659 / 39.7                    | 107 / 31.7                  |                |
| intermediate risk II                 | 369 / 22.3                    | 71 / 21.1                   |                |
| high risk                            | 235 / 14.2                    | 38 / 11.3                   |                |
| primary MDS                          | 1366 / 82.4                   | 247 / 73.1                  | <0.0005        |
| therapy-related MDS                  | 171 / 10.3                    | 101 / 26.9                  |                |
| <b>MDS CI</b>                        | n = 1015                      | n = 347                     |                |
| Low risk                             | 445 / 43.8                    | 179 / 51.6                  | 0.125          |
| Intermediate risk                    | 447 / 44.1                    | 128 / 36.9                  |                |
| High risk                            | 123 / 12.1                    | 40 / 11.5                   |                |

**Table 2.** Baseline characteristics in the prospective cohort 2

|                                | <b>Adherent pts</b> | <b>Non-adherent pts</b> | <b>p-value</b> |
|--------------------------------|---------------------|-------------------------|----------------|
|                                | n=257               | n=103                   |                |
|                                | n / %               | n / %                   |                |
| <b>Median age at diagnosis</b> | 65 (23-88)          | 62 (31-82)              | 0.016          |
| <b>gender</b>                  |                     |                         | 0.177          |
| male                           | 95 / 37.0           | 57 / 55.3               |                |
| female                         | 162 / 63.0          | 46 / 44.7               |                |
| <b>WHO 2016 subtype</b>        |                     |                         | 0.333          |
| MDS SLD                        | 4 / 1.7             | 3 / 2.9                 |                |
| MDS RS SLD                     | 12 / 5.0            | 3 / 2.9                 |                |
| MDS MLD                        | 73 / 30.2           | 27 / 26.2               |                |
| MDS RS MLD                     | 21 / 8.7            | 9 / 8.7                 |                |
| MDS EB 1                       | 26 / 10.7           | 12 / 11.6               |                |
| MDS EB 2                       | 36 / 14.9           | 14 / 13.6               |                |
| MDS del(5q)                    | 11 / 4.5            | 6 / 5.8                 |                |
| CMML                           | 29 / 12.0           | 12 / 11.8               |                |
| sAML                           | 11 / 4.5            | 4 / 3.9                 |                |
| MDS U                          | 16 / 6.6            | 10 / 9.7                |                |
| RARS-T                         | 3 / 1.2             | 3 / 2.9                 |                |
| <b>IPSS risk group</b>         | n = 227             | n = 93                  | 0.170          |
| low risk                       | 92 / 40.5           | 26 / 28.0               |                |
| intermediate risk I            | 66 / 29.1           | 36 / 38.7               |                |
| intermediate risk II           | 45 / 19.8           | 19 / 20.4               |                |
| high risk                      | 24 / 10.6           | 12 / 12.9               |                |
| <b>MDS CI</b>                  | n = 239             | n = 92                  | 0.242          |
| low risk                       | 120 / 50.2          | 50 / 54.3               |                |
| intermediate risk              | 87 / 36.4           | 35 / 38.0               |                |
| high risk                      | 32 / 13.4           | 7 / 7.6                 |                |
| <b>HCT CI</b>                  | n = 239             | n = 88                  | 0.354          |
| low risk                       | 80 / 33.5           | 38 / 43.2               |                |
| intermediate risk              | 63 / 26.4           | 15 / 17.0               |                |
| high risk                      | 96 / 40.1           | 35 / 39.8               |                |

**Tables 3, 4, 5, 6, 7.** Baseline characteristics in the retrospective cohort 1 separated by therapeutic category

The group of adherent patients includes guideline-adherent patients as well as patients, who did not receive a certain treatment since they did not prove eligible for it.

The group of non-adherent patients includes patients, who did not receive a therapy they proved eligible for and patients who, despite being eligible, did not receive the respective treatment.

**Table 3.** Baseline characteristics of adherent and non-adherent patients in the therapeutic group of erythropoietin

| Erythropoietin                 | Adherent pts<br>n = 73<br>n / % | Non-adherent<br>pts<br>n = 21<br>n / % | p-value |
|--------------------------------|---------------------------------|----------------------------------------|---------|
| <b>gender</b>                  |                                 |                                        | 0.363   |
| male                           | 43 / 58.9                       | 10 / 47.6                              |         |
| female                         | 30 / 41.1                       | 11 / 52.4                              |         |
| <b>median age at diagnosis</b> | 71 (41-87)                      | 63 (19-78)                             | 0.002   |
| <b>IPSS risk group</b>         |                                 |                                        | 0.019   |
| low risk                       | 28 / 38.4                       | 2 / 9.5                                |         |
| intermediate risk I            | 45 / 61.1                       | 19 / 90.5                              |         |
| <b>WHO 2016 subtype</b>        | n = 70                          | n = 21                                 | 0.470   |
| MDS SLD                        | 1 / 1.4                         | 1 / 4.8                                |         |
| MDS RS SLD                     | 8 / 11.4                        | 3 / 14.3                               |         |
| MDS MLD                        | 33 / 47.1                       | 10 / 47.6                              |         |
| MDS RS MLD                     | 12 / 17.1                       | 1 / 4.8                                |         |
| MDS EB 1                       | 4 / 5.7                         | 4 / 19.0                               |         |
| del 5q                         | 3 / 4.3                         | 2 / 9.5                                |         |
| CMML                           | 5 / 7.3                         | 0                                      |         |
| RARS-t                         | 4 / 5.7                         | 0                                      |         |
| <b>MDS CI</b>                  | n = 62                          | n = 15                                 | 0.032   |
| low risk                       | 26 / 41.9                       | 9 / 60.0                               |         |
| intermediate risk              | 21 / 33.9                       | 6 / 40.0                               |         |
| high risk                      | 15 / 24.2                       | 0                                      |         |

**Table 4.** Baseline characteristics of adherent and non-adherent patients in the therapeutic group of iron chelation

| Chelation                      | Adherent pts<br>n = 183<br>n / % | Non-adherent pts<br>n = 44<br>n / % | p-value |
|--------------------------------|----------------------------------|-------------------------------------|---------|
| <b>gender</b>                  |                                  |                                     | 0.029   |
| male                           | 100 / 54.6                       | 32 / 72.7                           |         |
| female                         | 83 / 45.4                        | 12 / 27.3                           |         |
| <b>median age at diagnosis</b> | 67 (19-91)                       | 70 (39-89)                          | 0.108   |
| <b>IPSS risk group</b>         |                                  |                                     | 0.162   |
| low risk                       | 73 / 39.4                        | 15 / 34.1                           |         |
| intermediate risk I            | 110 / 60.1                       | 29 / 65.9                           |         |
| <b>WHO 2016 subtype</b>        | n = 178                          | n = 44                              | 0.316   |
| MDS SLD                        | 17 / 9.5                         | 3 / 6.8                             |         |
| MDS RS SLD                     | 18 / 10.1                        | 6 / 13.6                            |         |
| MDS MLD                        | 74 / 41.6                        | 21 / 47.7                           |         |
| MDS RS MLD                     | 18 / 10.1                        | 3 / 6.8                             |         |
| MDS EB 1                       | 11 / 6.2                         | 6 / 13.6                            |         |
| MDS EB 2                       | 2 / 1.1                          | 2 / 4.6                             |         |
| del 5q                         | 22 / 12.4                        | 2 / 4.6                             |         |
| CMMML                          | 14 / 7.9                         | 1 / 2.3                             |         |
| RARS-t                         | 2 / 1.1                          | 0                                   |         |
| <b>MDS CI</b>                  | n = 128                          | n = 32                              | 0.030   |
| low risk                       | 66 / 51.6                        | 10 / 31.3                           |         |
| intermediate risk              | 50 / 39.1                        | 15 / 46.9                           |         |
| high risk                      | 12 / 9.3                         | 7 / 21.8                            |         |

**Table 5.** Baseline characteristics of adherent and non-adherent patients in the therapeutic group of Lenalidomide

| Lenalidomide                   | Adherent pts<br>n = 27<br>n / % | Non-adherent pts<br>n = 18<br>n / % | p-value |
|--------------------------------|---------------------------------|-------------------------------------|---------|
| <b>gender</b>                  |                                 |                                     | 0.798   |
| male                           | 8 / 29.6                        | 6 / 33.3                            |         |
| female                         | 19 / 70.4                       | 12 / 66.7                           |         |
| <b>median age at diagnosis</b> | 73 (32-85)                      | 69 (39-89)                          | 0.631   |
| <b>IPSS risk group</b>         |                                 |                                     | 0.420   |
| low risk                       | 21 / 77.8                       | 12 / 66.7                           |         |
| intermediate risk I            | 6 / 22.2                        | 6 / 33.3                            |         |
| <b>WHO 2016 subtype</b>        |                                 |                                     |         |
| del 5q                         | 27 / 100.0                      | 18 / 100.0                          | 1.000   |
| <b>MDS CI</b>                  | n = 19                          | n = 17                              | 0.370   |
| low risk                       | 13 / 68.4                       | 8 / 47.1                            |         |
| intermediate risk              | 5 / 26.3                        | 8 / 47.0                            |         |
| high risk                      | 1 / 5.3                         | 1 / 5.9                             |         |

**Table 6.** Baseline characteristics of adherent and non-adherent patients in the therapeutic group of Azacytidin

| Azacytidin                     | Adherent pts<br>n = 70<br>n / % | Non-adherent pts<br>n = 102<br>n / % | p-value |
|--------------------------------|---------------------------------|--------------------------------------|---------|
| <b>gender</b>                  |                                 |                                      | 0.173   |
| male                           | 49 / 70.0                       | 61 / 59.8                            |         |
| female                         | 21 / 30.0                       | 41 / 40.2                            |         |
| <b>median age at diagnosis</b> | 69 (20-89)                      | 65 (21-87)                           |         |
| <b>IPSS risk group</b>         |                                 |                                      | 0.008   |
| intermediate risk II           | 55 / 78.5                       | 67 / 65.7                            |         |
| high risk                      | 15 / 21.1                       | 35 / 34.3                            |         |
| <b>WHO 2016 subtype</b>        | n = 66                          | n = 100                              | 0.012   |
| MDS SLD                        | 2 / 3.0                         | 1 / 1.0                              |         |
| MDS RS SLD                     | 1 / 1.4                         | 0                                    |         |
| MDS MLD                        | 15 / 22.7                       | 12 / 12.0                            |         |
| MDS RS MLD                     | 2 / 3.0                         | 4 / 4.0                              |         |
| MDS EB 1                       | 16 / 24.2                       | 14 / 14.0                            |         |
| MDS EB 2                       | 22 / 33.3                       | 45 / 45.0                            |         |
| CMML                           | 3 / 4.6                         | 7 / 7.0                              |         |
| MDS U                          | 2 / 3.0                         | 1 / 1.0                              |         |
| AML                            | 3 / 4.6                         | 16 / 16.0                            |         |
| <b>MDS CI</b>                  | n = 53                          | n = 81                               | 0.102   |
| low risk                       | 18 / 34.0                       | 34 / 42.0                            |         |
| intermediate risk              | 21 / 39.6                       | 38 / 46.9                            |         |
| high risk                      | 14 / 26.4                       | 9 / 11.1                             |         |

**Table 7.** Baseline characteristics of adherent and non-adherent patients in the therapeutic group of allogeneic stem cell transplantation

| alloSCT                        | adherents pts<br>n = 959<br>n / % | non-adherent pts<br>n = 388<br>n / % | p-value |
|--------------------------------|-----------------------------------|--------------------------------------|---------|
| <b>gender</b>                  |                                   |                                      | 0.542   |
| male                           | 571 / 59.5                        | 238 / 61.3                           |         |
| female                         | 388 / 40.5                        | 150 / 38.7                           |         |
| <b>median age at diagnosis</b> | 70 (18-91)                        | 61 (18-73)                           | <0.005  |
| <b>IPSS risk group</b>         | n = 959                           | n = 388                              | <0.005  |
| low risk                       | 308 / 32.1                        | 13 / 3.4                             |         |
| intermediate risk I            | 398 / 41.5                        | 116 / 29.9                           |         |
| intermediate risk II           | 150 / 15.6                        | 151 / 38.9                           |         |
| high risk                      | 103 / 10.8                        | 108 / 27.8                           |         |
| <b>WHO 2016 subtype</b>        | n = 949                           | n = 387                              | <0.005  |
| MDS SLD                        | 74 / 7.8                          | 10 / 2.6                             |         |
| MDS RS SLD                     | 58 / 6.1                          | 0                                    |         |
| MDS MLD                        | 343 / 36.1                        | 70 / 18.1                            |         |

|                   |            |            |       |
|-------------------|------------|------------|-------|
| MDS RS MLD        | 88 / 9.3   | 16 / 4.1   |       |
| MDS EB 1          | 85 / 9.0   | 100 / 25.8 |       |
| MDS EB 2          | 124 / 13.1 | 106 / 27.4 |       |
| del 5q            | 92 / 9.7   | 5 / 1.3    |       |
| AML               | 62 / 6.5   | 79 / 20.4  |       |
| MDS U             | 15 / 1.6   | 0          |       |
| RARS-t            | 8 / 0.8    | 1 / 0.3    |       |
| <b>MDS CI</b>     | n = 630    | n = 211    | 0.015 |
| low risk          | 268 / 42.5 | 104 / 49.3 |       |
| intermediate risk | 291 / 46.2 | 88 / 41.7  |       |
| high risk         | 71 / 11.3  | 19 / 9.0   |       |
